# Supplementary material
Source: PubMed Central journal article supplement (PMC6140646)
Supplement: jps-41-2-D16-009-s001.pdf [file jps-41-2-D16-009-s001.pdf]

# Journal of Pesticide Science

supplementary materials

DOI:10.1584/jpestics.D16-009

## **Structure- and stereospecific transport of strigolactones from roots to shoots**

Xiaonan XIE, Kaori YONEYAMA, Takaya KISUGI, Takahito NOMURA,  
Kohki AKIYAMA, Tadao ASAMI and Koichi YONEYAMA\*

Pesticide Science Society of Japan

*<http://pssj2.jp/eng/>*

*Supplementary data for Xie et al.,*

*LC-MS/MS analytical conditions for detection and identification of deuterated strigolactones from extracts of shoots harvested 20 hr after treatment.*

Identification of strigolactones were performed using a triple quadrupole/linear ion trap instrument (LIT) (QTRAP5500; AB Sciex) with an electrospray ionization (ESI) source and coupled to a UHPLC system (Nexera X2; Shimadzu). Chromatographic separation was achieved on isocratic (65% MeCN–H<sub>2</sub>O containing 0.1% acetic acid) UHPLC on a chiral column (CHIRAL-PACK AD-3R,  $\phi$  2.1  $\times$  150 mm, 3.0  $\mu$ m; DAICEL Corp., Japan). The column was operated at 20°C with a flow-rate of 0.2 mL/min. MS/MS spectra were recorded in product ion scan mode using LIT. Ion source was maintained at 400°C with curtain gas at 20 psi, collisional activated dissociation (CAD) gas at 7 psi (12 psi for LIT), ion source gas at 80 psi, and ion source gas<sub>2</sub> at 70 psi. Ionspray voltage was set at 5,500 V in positive ion mode and –4,500 V in negative ion mode. Declustering, entrance, and collision cell exit potentials were maintained at 60, 10, and 15 V, respectively.

One-fifth of the samples dissolved in 5  $\mu$ L MeCN were injected to the LC–MS/MS. The transitions of  $m/z$  348–234, 348–206 and 348–97 were monitored for  $d_1$ -orobanchol and its isomers;  $m/z$  337–240, 337–222, and 337–97 for  $d_6$ -4-deoxyorobanchol and its isomers in the ESI positive mode.
